1 **Racial/Ethnic Differences in COVID-19-Traumatic Symptoms, Sleep, Coping Outcomes in**  
2 **a Group of New-Yorkers**

3

4 Judite Blanc<sup>1</sup>, Azizi Seixas<sup>2</sup>, Sean Small, Evan Auguste,<sup>4</sup> Anthony Briggs<sup>5</sup>, Yoann Sophie  
5 Antoine<sup>6</sup>, Omonigho Michael Bubu<sup>7</sup>, Girardin Jean-Louis<sup>8</sup>

6 <sup>1, 2, 8</sup>Department of Psychiatry & Behavioral Sciences, University of Miami Miller School of  
7 Medicine

8 <sup>3</sup>Steinhardt School of Culture, Education, and Human Development, New York University

9 <sup>4</sup>University of Massachusetts

10 <sup>5, 7</sup>NYU Grossman School of Medicine

11 <sup>6</sup>Nova Southeastern University

12

13 **Author Note**

14 This study has no conflicts of interest to disclose. Correspondence to this article should  
15 be addressed to Judite Blanc, Ph.D., Center for Translational Sleep and Circadian Sciences,  
16 Department of Psychiatry & Behavioral Sciences, University of Miami Miller School of  
17 Medicine, Clinical Research Building, 14<sup>th</sup> Floor 1120 NW 14<sup>th</sup> St, Room 1448, Miami FL  
18 33136. Office: 305-242-7452. Email: [Juditeblanc@miami.edu](mailto:Juditeblanc@miami.edu)

19

20

## Abstract

21 **Background:** Little research has examined within/between group predictors and mediators of  
22 race/ethnic differences or disparities in mental and sleep health outcomes arising from the  
23 experience of the COVID-19 pandemic. **Objectives:** This study sought to evaluate the effect of  
24 COVID-19 experiences on trauma-related symptoms and sleep quality among a  
25 multiracial/ethnic sample in New York. **Method:** This is a cross-sectional study conducted  
26 online among multiethnic adults (n=541) who experienced the pandemic in New York from  
27 September to November 2020. Comparisons of characteristics and mean scores by race/ethnicity  
28 status were conducted using one-way ANOVA and independent samples t-tests for continuous  
29 variables and chi-square tests for categorical variables. Multilinear regression was used for  
30 associations between social determinants of health and/or SES, trauma-related symptoms,  
31 coping, and sleep. **Results:** Compared to Whites [Mean (SD)= (24.1(7.6)] and other group  
32 [Mean (SD)=24.9(8.2), Blacks [Mean (SD)=(26.3(6.4)] and Hispanics [Mean(SD)=(27.2(8.2)]  
33 reported higher level of peritraumatic distress [ df= 3; F=4273; p=0.005). The prevalence of  
34 clinically significant PTSD symptoms was 21.4%(n=113): [Whites=31(16.3%);  
35 Blacks=28(25.7%); Hispanics=24(25%); and other groups=30(22.4%);  $\chi^2 =4.93$ ; p=0.177]. This  
36 rate doubled [48.3%(257)] when it comes to the overall clinically significant depression level.  
37 Compared to all subcategories, [Blacks=52(47.7%); Hispanics =62(64.6%); other  
38 group=66(49.3%)], depression symptoms were lower among Whites [77(39.9%;  $\chi^2 =15.71$ ;  
39 p=0.001]. We found a prevalence of insufficient sleep <6 hours of 41%(198):  
40 [Whites=69(39.4%); Blacks=43(41.7%); Hispanics=46(52.3%); other groups=40(34.2%);  
41  $\chi^2 =12.21$ ; p=0.057]. Several unique demographic predictors of PTSD emerged for distinct  
42 racial/ethnic groups. Among Blacks, sex [ $\beta = -0.22$ ; p < .01] and employment [ $\beta = -0.159$ ; p <  
43 .05] emerged as significant predictors for PTSD, but for no other racial/ethnic group.  
44 Interestingly, among Hispanics [ $\beta = -0.144$ ; p = .064] and Blacks [ $\beta = -0.174$ ; p = .0076],  
45 coping strategies did not mitigate PTSD or depressive symptoms. **Conclusion:** As New York  
46 and the rest of the world are trying to bounce back from the COVID-19 consequences, mental  
47 health outcomes are devastating, particularly among historically marginalized communities. This  
48 study provides insight into the emergency for policymakers to invest in racial justice programs  
49 and provide free access to culturally responsive mental health care for the most vulnerable  
50 groups.

51 **Keywords:** COVID-19, New York, Trauma-Related Symptoms, Coping, Mental Health  
52 Disparities.

53

54

55

56

57 **Introduction**

58 COVID-19 remains an ongoing public health crisis with mental health implications. As an  
59 unprecedented and pervasive disaster, COVID-19 is characteristic of a potentially traumatic  
60 event defined by the DSM-5, posing a fear-inducing, existential threat, as evidenced by its  
61 lethality [1]. Additionally, COVID-19 and previous pandemics (e.g., SARS) feature additional  
62 stressors such as quarantine and lockdown measures, the confluence of which resulting in acute  
63 and long-term (post-)pandemic psychological impacts [2, 3]. New York was the epicenter of the  
64 coronavirus crisis in the United States for more than a month. As such, COVID-19 had  
65 devastating effects on the public health, economic, and personal structures upholding New York  
66 State. Federal data show that New York was one of the states most devastated by the pandemic,  
67 especially during the Spring and Summer months of 2020, with over 200,000 laboratory-  
68 confirmed infection cases, 20,000 COVID-19-related deaths, and over 1.7 million filings for  
69 unemployment by the end of April 2020 [4, 5]. Mental health effects of COVID-19 were visible  
70 in New York City, with increased calls to *NYC Well* (Mental Health Support) related to anxiety  
71 in March and April 2020, compared to January and February [6]. Following quarantine and  
72 lockdown orders, the internet searches of New Yorkers (assessed via Google Trends) after March  
73 22, 2020, revealed a similar increase in symptoms. Specifically, searches for anxiety (18%),  
74 panic attack (56%), and insomnia (21%) rose significantly, whereas depression and suicide did  
75 not- suggesting the need for focused treatment during quarantine for New Yorkers [7]. Using the  
76 electronic health records of 2,358,318 patients from the New York City metropolitan region to  
77 examine changes in clinic psychiatric diagnoses between March 2020 and August 2021, Xiao et  
78 al. [8] found evidence further underscoring the severity of the psychological impact COVID-19  
79 had on one of the epicenters of the US early in the pandemic. For example, they found that

80 between February and August 2021, among patients without recent clinical psychiatric  
81 diagnoses, new psychosis, anxiety disorders, and mood disorders increased among both COVID-  
82 19-positive and negative persons (8). The greatest increases in psychiatric diagnoses among  
83 COVID-19-positive patients who were not hospitalized were anxiety (378.7%) and mood  
84 disorders (269.0%) [8]. Psychological consequences during COVID-19 were also higher among  
85 vulnerable populations such as under-resourced college students, healthcare workers, pregnant  
86 women, and caregivers in New York [9-12]. One study found the rates of insomnia symptoms of  
87 at least moderate severity in healthcare workers (HCWs) in New York City during the first wave  
88 to be 72.6% [13]. Another found rates of COVID-19-related acute stress, depression, and anxiety  
89 symptoms common among HCWs in New York at 57%, 48%, and 33%, respectively [14].  
90 Moreover, it was revealed that the pandemic disproportionately affected Hispanics and Black  
91 New Yorkers. The COVID-19 literature describes racial/ethnic disparities in COVID-19  
92 infections, hospitalizations, ICU admissions, and deaths, with Black and Hispanic people bearing  
93 the highest burden [15-19]. Similarly, racial/ethnic disparities in the harmful psychological  
94 consequences of COVID-19 have been demonstrated outside of New York [20, 21]. McKnight-  
95 Eily et al. [20] found disproportionately higher prevalence rates of self-reported suicidal ideation,  
96 depression, and increased or newly initiated substance abuse among Hispanic adults during the  
97 pandemic compared to Whites and Blacks [20]. Additionally, using two nationally representative  
98 US surveys with large sample sizes covering 2019 and 2020-21, Thomeer et al. [21] found that  
99 the mental health of racial minorities (Black and Hispanic) worsened disproportionately relative  
100 to Whites during the pandemic compared to before the pandemic, with significant increases in  
101 anxiety and depression. Specifically, in 2019, Blacks and Whites had rates of depression/anxiety  
102 at around 11% and Hispanics at 9.43%. And in 2020-21, Blacks (41.69%) and Hispanics

103 (44.23%) had larger increases than Whites (34.31%) [21]. Additionally, they found that their  
104 findings suggested that the relative mental health advantage experienced in minoritized groups  
105 before the pandemic reversed during the pandemic [21]. The surprising results of Silverman et al.  
106 [11] in relation to the literature regarding racial disparities in negative psychological  
107 consequences reveal the complexities of examining social determinants of health and mental  
108 health. It is, thus, important to further study these disparities while considering the literature on  
109 social determinants of health. In the US, social determinants of negative health and lower  
110 socioeconomic status are inextricable from minoritizations and racial/ethnic minority status [28].  
111 Racial and ethnic minority groups are more likely to live in crowded conditions, have less access  
112 to stable housing and livable wages, and have jobs that cannot shift remotely [10, 28]. Racial  
113 disparities have been observed in the interaction between economic stressors (e.g., food  
114 insecurity, job loss) and mental health consequences during COVID-19 [28-30]. As of April 12,  
115 2020, near the height of the first wave in New York City, Hispanic and Black residents reported  
116 more housing-related stressors, such as fear of eviction and inability to pay rent [10], similarly  
117 reflected by disparities in national unemployment rates the same month [28]. The loss of health  
118 insurance and food insecurity/insufficiency were also more likely to be reported by Black and/or  
119 Hispanic populations [10, 30]. Of importance is that although these stressors increase during  
120 disasters such as COVID-19, the negative effect of this is distinctly worsened in groups that have  
121 already experienced socioeconomic difficulties [10, 28, 29]. Thus, pandemic-related, and  
122 concomitant socioeconomic stressors have implications for psychological distress during the  
123 pandemic, particularly for marginalized populations in New York.

124 With the pandemic being an ongoing, potentially traumatic event, it is valuable to gain insight  
125 into the mental health effects that precipitated early in the onset of COVID-19, especially in

126 minoritized populations such as Blacks in New York. Disaster research literature among  
127 populations exposed to natural and man-made crises report a set of factors that may influence  
128 survivors' resilience to deleterious disaster outcomes. These factors are usually regrouped into  
129 chronological order. In the case of COVID-19, we are referring to 1) pre-COVID-19 factors, 2)  
130 Peri-COVID-19 and lockdown factors, and 3) Post-COVID-19 lockdown factors (*Figure 1*) [9].  
131 It is likely that mental health outcomes of the experience of the COVID-19 pandemic among  
132 New Yorkers are related to risk and protective factors at various socio-ecological levels,  
133 including individual (e.g., age, gender, and occupation), interpersonal (e.g., social support and/or  
134 coping strategies), institutional (e.g., public health policies, state regulations), and community  
135 (e.g., stigma, ethnicity, and cultural beliefs) factors. Indeed, Ghassabian et al. [12] found that  
136 among pregnant women and/or mothers of young children in a diverse NYC cohort, a history of  
137 depression (pre-COVID-19 factor), current financial difficulties, and being infected with  
138 COVID-19 (both peri-COVID-19 factors) were robustly associated with higher perceived stress.  
139 Thus, mental health is best understood as a dynamic state in which multiple intersecting social  
140 and environmental factors influence individual psychosocial development. In the womb, the  
141 mother's mental and physical health status impacts the developing fetus [11]. Parent bonding and  
142 the home environment greatly affect the very early years. Thereafter, factors such as  
143 unemployment, poverty, physical health problems in adulthood, and levels of social and  
144 community connectedness in later life all have a part to play in influencing an individual's ability  
145 to cope in disaster contexts. Adverse experiences can occur widely and cluster in some families,  
146 communities, and work settings already experiencing other destabilizing factors. Thus, one's zip  
147 code plays a more prominent role than one's genetic code in many ways, and the term  
148 "exposome" has been proposed as a new paradigm encompassing all aspects of human

149 environmental exposures (not only genetic) starting from conception, complementing the  
150 genome and affecting health in a whole new way. It is, therefore, crucial that in disaster settings,  
151 if mental health problems are to be prevented, the social, economic, health, and ecological  
152 environment in which they are developing needs to be addressed [31].

153 *Figure 1: Pre, Peri, and Post-Covid-19 Lockdown Risk and Protective Factors For Mental*  
154 *Health*

155

## RISK AND PROTECTIVE FACTORS TO MENTAL HEALTH DURING COVID-19

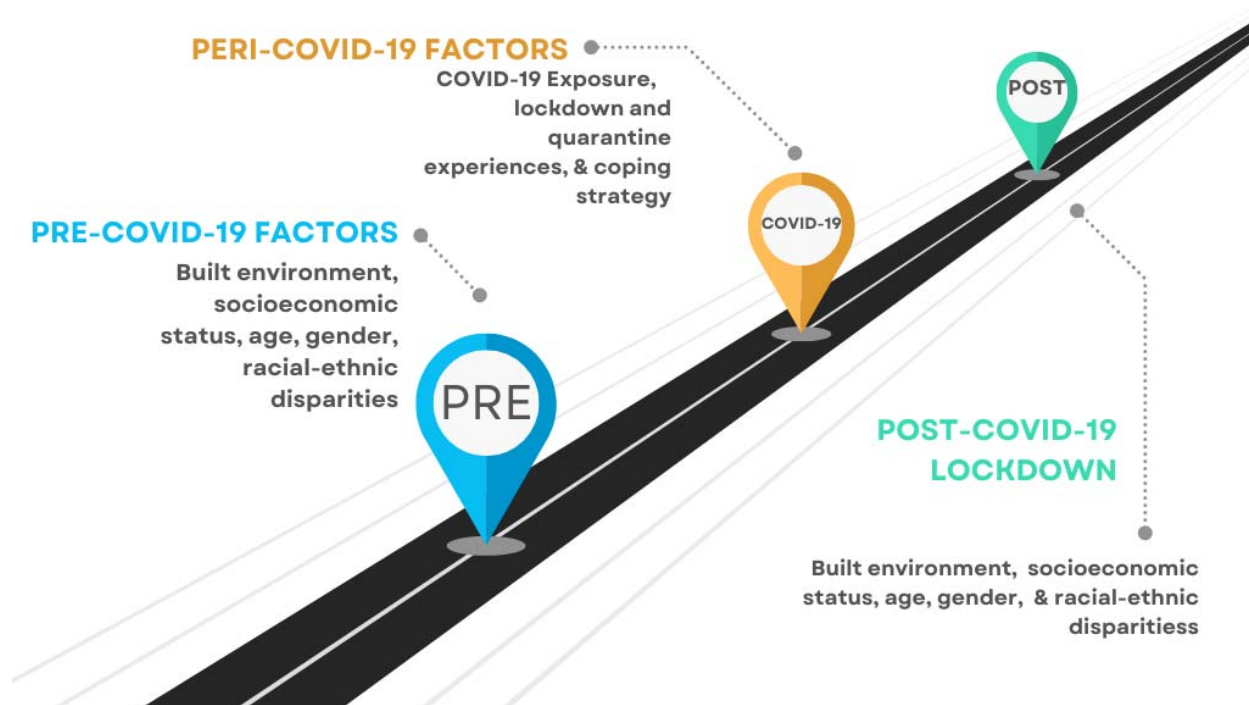

156

157 Hence, understanding specific pre- (built environment, socioeconomic status-SES, age,  
158 sex/gender, racial-ethnic disparities), peri- (serostatus, COVID-19 related experiences, the

159 overall approach to lockdowns such as coping strategy), and post-lockdown (built environment,  
160 SES, age, sex/gender, racial-ethnic disparities) factors associated to trauma-related symptoms  
161 may inform the development of behavioral, translational interventions and programs to reduce  
162 the adverse mental health outcomes of the pandemic in vulnerable populations [32]. A few  
163 studies have examined within and between-group predictors and mediators of race/ethnic  
164 differences in trauma-related symptoms and sleep health outcomes during the US-COVID-19  
165 pandemic. Aiming to fill this gap, we investigate the following research questions: 1) Among  
166 adult survivors of the COVID-19 pandemic during Spring 2020 in New York, what is the  
167 prevalence of trauma-related (PTSD and depression) and lower sleep quality symptoms? 2)  
168 Among these survivors in New York, what are the effects of socio-demographic factors and  
169 social determinants of health on trauma-related symptoms (PTSD and depression) and sleep  
170 health, and whether this relationship is mediated/moderated by race/ethnicity?

### 171 Hypotheses

172 We hypothesized that:

173 1) Given the high fatality rate of the pandemic in New York City during Spring 2020 among  
174 Blacks and Hispanics, the prevalence of trauma-related symptoms such as PTSD, depression,  
175 and sleep problems would be highest among these racial/ethnic groups.

176 2) Social determinants of health and/or socioeconomic statuses (SES) factors such as sex,  
177 employment status, income, education, and marital status would explain within and between  
178 racial/ethnic group differences in trauma-related symptoms such as PTSD, depression, and sleep  
179 health;



180 3) Within racial/ethnic groups, peritraumatic distress will be the strongest predictor of trauma-  
181 related symptoms and sleep health after controlling for social determinants of health and/or SES  
182 factors.

## 183 **Method**

### 184 **Participants**

185 This cross-sectional study was conducted among adults who experienced the COVID-19  
186 pandemic in New York State during the last semester of 2020. Participants were invited through  
187 ResearchMatch, Twitter, LinkedIn, secured email, and word of mouth within our community-  
188 based network throughout New York. Inclusion criteria comprised: 1) “Age  $\geq$  18 and living in  
189 New York at the time of the study since the first case of COVID-19 was reported on March 1st  
190 of 2020, and 2) Able to read and speak English. Exclusion criteria comprised: 1) Significant  
191 cognitive impairment or apparent during screening, and 2) History or current diagnosis of  
192 schizophrenia or other psychotic disorders. Between September and November 2020, 764  
193 participants completed the screening questionnaire. Among them, 223 were excluded for not  
194 meeting the inclusion criteria or for incomplete data, and 541 were included for final statistical  
195 analysis. The New York University School of Medicine Institutional Review Board approved the  
196 study protocol. All participants provided electronic informed consent before enrollment.

### 197 **Procedures**

198 The online survey included questions about demographics, including age, marital status,  
199 education level, employment status, and job types, socioeconomic status, place of birth, amount  
200 of time in the US. Previous medical history and COVID-19-related experiences included

201 assessing distress due to COVID-19-specific stressors, trauma-related, sleep, and trauma-coping  
202 self-efficacy.

203 While the surveys were electronically captured, our outreach was multimodal, and it was the  
204 only way we could reach out to individuals, given the COVID-19 restrictions. We also utilized  
205 evidence-based community engagement strategies such as contacting faith-based organizations  
206 and community-based organizations who contacted their constituents through the phone and  
207 SMS.

## 208 **Measures**

### 209 *Post-Traumatic Stress Disorder (PTSD) Symptoms*

210 Symptoms of PTSD in this study were assessed using the Posttraumatic Stress Disorder  
211 Checklist 5 (PCL-5). The PCL-5 is a 20-item self-report measure that assesses the presence and  
212 severity of DSM-5 symptoms of PTSD. Respondents were asked to rate how much they were  
213 bothered by a list of problems in the past month because of COVID-19. Examples of items are:  
214 1) Repeated, disturbing, and unwanted memories of the stressful experience; 2) Repeated,  
215 disturbing dreams of the stressful experience; 3) Suddenly feeling or acting as if the stressful  
216 experience was happening again (as if you were back there reliving it); to 4) Feeling very upset  
217 when something reminded you of the stressful experience [33]. Reliable PCL- 5 cutoff scores  
218 range between 31-33 for a PTSD diagnosis [34]. According to the National Center for PTSD  
219 “Using the PTSD Checklist for DSM-5 (PCL-5)” a score of 31-33 or higher suggests the patient  
220 may benefit from PTSD treatment. PTSD patients can either be referred to a PTSD specialty  
221 clinic or offered an evidence-based treatment such as Prolonged Exposure (PE), Cognitive  
222 Processing Therapy (CPT), or Eye Movement Desensitization and Reprocessing (EMDR). When

223 a patient's score is lower than 31-33, this may indicate that they are experiencing subthreshold  
224 symptoms of PTSD or do not meet the criteria for PTSD, and this should be considered when  
225 planning their treatment. This questionnaire demonstrated good internal consistency (Cronbach's  
226  $\alpha = .93$ ) in the current sample.

### 227 *Depressive Symptoms*

228 Symptoms of depression were assessed using the Patient Health Questionnaire (PHQ-9), a  
229 multipurpose module for screening, diagnosing, monitoring, and measuring the severity of  
230 depressive symptoms. Using a Likert-scale ranging from (1) *Not at all* to (3) *Nearly every day*,  
231 PHQ-9 was used to assess how often participants were experiencing depressive symptoms, such  
232 as 1) Little interest or pleasure in doing things; 2) Feeling down, depressed, or hopeless; 3)  
233 Trouble falling or staying asleep or sleeping too much. The overall scores range from 0-27, with  
234 a cutoff score of 9 and above, indicating mild to severe depressive symptoms [35]. The PHQ-9  
235 has been shown to be unidimensional, reliable, and mostly free of dimensional items functioning  
236 across countries during the pandemic [36]. This questionnaire demonstrated good internal  
237 consistency (Cronbach's  $\alpha = .89$ ) in the current sample.

### 238 *Sleep Quality*

239 Sleep quality during the past month due to experiencing the COVID-19 pandemic was assessed  
240 using the Pittsburgh Sleep Quality Index (PSQI), which consists of 4 open-ended and 14  
241 questions (18 questions in total) answered using event frequency and semantic scales. Examples  
242 of items include: "1) During the past month, what time have you usually gone to bed at night; 2)  
243 During the past month, how long (in minutes) has it usually takes you to fall asleep each night;  
244 3) During the past month, how often have you had trouble sleeping because you cannot get to

245 sleep within 30 minutes; 4) During the past month, how would you rate your sleep quality  
246 overall?" [37]. A cut-off score of 5 on the global scale was used to assess sleep quality among  
247 respondents [38]. We defined insufficient sleep as total sleep time  $\leq 6$  hours. In this present  
248 sample the seven component scores of the PSQI had a low level of internal reliability  
249 (Cronbach's  $\alpha = .53$ ) compared to the high level of 0.83 reported by the validation study [37, 38].

#### 250 *COVID-19-Related Experiences and Distress*

251 COVID-19-related experiences operationalized whether participants had been recently diagnosed  
252 with COVID-19 and/or had a close relative or family member recently diagnosed with COVID-  
253 19 and quantified/characterized home quarantine experience. COVID-19-related experiences  
254 were assessed using the "*COVID-19-related experiences questionnaire*" (*Yes/No items*)  
255 developed by the authors. Home quarantine experience included 8 items about whether  
256 participants: 1) Wear a mask when in contact with family members; 2) Take their temperature  
257 twice a day; 3) Sleep in a separate room; or 4) Do not go to community activities (functions,  
258 shopping, etc.), among others. COVID-19 quarantine experience scores ranged from 1-8 in our  
259 study. This questionnaire demonstrated good internal consistency (Cronbach's  $\alpha = .72$ ) in the  
260 current sample.

#### 261 *Peritraumatic Distress*

262 The Peritraumatic Distress Inventory (PDI) consists of 13 self-reported items originally  
263 developed based on DSM-4 criteria for PTSD diagnosis [39]. It was used to assess the intensity  
264 of emotional and physiological distress that participants were experiencing during the pandemic.  
265 Using a 5-point Likert scale with the following anchors: 0 = Not at All True; 1 = Slightly True; 2  
266 = Somewhat True; 3 = Very True; and 4 = Extremely True, participants were asked to rate

267 feelings such as 1) Helplessness; 2) Sadness or grief, and 3) Feeling afraid for their safety. Total  
268 scores ranged from 0–to 52. The original English PDI version demonstrated that a cutoff score of  
269 23 (sensitivity = 71%; specificity = 73%) is a good index to predict clinically elevated PTSD  
270 among traumatically injured patients after 30 days [40]. The PDI demonstrated good internal  
271 consistency (Cronbach’s  $\alpha = .87$ ) in the current sample.

### 272 *Trauma Coping Self-Efficacy*

273 The Trauma Coping Self-Efficacy (CSE-T) comprises 20 questions that assess participants’  
274 perceived ability to cope with challenges and demands from a traumatic event similar to the  
275 COVID-19 pandemic. Respondents were asked to rate their capability to handle a series of  
276 traumatic pandemic demands on a 7-point scale from 1 (*not at all capable*) to 7 (*totally capable*),  
277 in dealing with the following questions: 1) Deal with my emotions (anger, sadness, depression,  
278 anxiety) since I experienced my trauma; 2) Deal with the impact the trauma has had on my life;  
279 3) Get my life back to normal, or 4) Control distressing thoughts about the traumatic experience  
280 [41]. This measure demonstrated reliability in assessing coping self-efficacy in stress associated  
281 with the COVID-19 pandemic and good internal consistency (Cronbach’s  $\alpha = .92$ ) in the current  
282 sample [42].

283

### 284 *Statistical Analysis*

285 Participant characteristics are reported for the sample. Comparisons of participant characteristics  
286 based on race/ethnicity were conducted using one-way ANOVA and independent samples t-tests  
287 for continuous variables and chi-square tests for categorical variables. Characteristics were

288 reported as means with standard deviations or as frequencies. Associations between social  
289 determinants of health and/or SES and trauma-related symptoms, sleep, and coping were  
290 examined using stratified multilinear regression analysis by race/ethnicity. The model examined  
291 the association between age, NYC residency, sex, employment status, peritraumatic distress and  
292 coping with trauma-related symptoms, and sleep health by race/ethnicity. The strength of the  
293 association between SES characteristics with trauma-related symptoms, sleep health, and coping  
294 was evaluated by interpreting the strength of the regression parameter *Beta* as well as the  
295 variance explained by the model (defined as the  $R^2$  adjusted).

296

297

## Results

### 298 Participants Characteristics

299 The sample consisted of 541 participants recruited across New York State. The majority were  
300 female [373 (68.9%)], and the mean age was 40.9 years (SD=15). As indicated in Table 1, 36.6%  
301 of volunteers identified as White, 20.5% as Black, 17.9% as Hispanic, and 25% identified as  
302 either Asian (42), Native-American (1), Pacific-Islander (1), or Unknown (91) (classified as  
303 “Other”). Among our sample, 342(63.2%) had a college education [Whites= 116(58.9%);  
304 Blacks=81(73%); Hispanics= 66(68%); Other groups=79(59.4%);  $\chi^2 =$ ;  $p<0.001$ ]. An amount of  
305 123(25.2%) were essential workers, [Whites=50(26.2%); Blacks=29(30.5%);  
306 Hispanics=13(16.3%); other groups=31(25.4%);  $\chi^2 =4.92$  ;  $p=0.177$ ].

307 ● [insert table 1 here]

308 ●

309 **The Prevalence of Peritraumatic Distress, , PTSD, Depression and Sleep Problems**

310 As noted in Table 1, there were significant racial and ethnic differences/disparities in the  
311 prevalence of clinically significant peritraumatic distress, depressive, and PTSD symptoms.  
312 Concerning COVID-19 experiences, 4.1%(22) suffered from COVID-19 [Whites (7); Blacks (1);  
313 Hispanics (8); other groups(6);  $\chi^2 = 7.39$ ;  $p = .06$ ]. A total of 102(18.9%) had a family member  
314 who was diagnosed with COVID-19 [Whites=21(10.6%); Blacks=26(23.4%); Hispanics=  
315 32(33%); Other groups=23(17%);  $\chi^2 = 23.27$ ;  $p = 0.000$ ]. Compared to Whites  
316 [Mean(SD)=(24.1(7.6)] and th other groups [Mean(SD)=24.9(8.2), Blacks  
317 [Mean(SD)=(26.3(6.4)] and Hispanics [Mean(SD)=(27.2(8.2)] reported higher level of  
318 peritraumatic distress [  $df = 3$ ;  $F = 4273$ ;  $p = 0.005$ ].

319 We found a prevalence of clinically significant PTSD symptoms of 21.4%(n=113)  
320 [Whites=31(16.3%); Blacks=28(25.7%); Hispanics=24(25%); and other groups=30(22.4%);  $\chi^2$   
321 =4.93;  $p = 0.177$ ]. This rate doubled [48.3%(257)] when it comes to the overall clinically  
322 significant depression level; and compared to all subcategories [Blacks=52(47.7%); Hispanics  
323 =62(64.6%); other groups=66(49.3%);  $\chi^2 = 15.71$ ;  $p = 0.001$ ], depression symptoms were lower  
324 among Whites[77(39.9%]. Finally, we found a prevalence of insufficient sleep <6 hours of  
325 41%(198) [Whites=69(39.4%); Blacks=43(41.7%); Hispanics=46(52.3%); other  
326 groups=40(34.2%);  $\chi^2 = 12.21$ ;  $p = 0.057$ ].

327

328

329 [\* Insert table 2 here]

330

331

332 **The Moderating Role of Race/Ethnicity in the Relationship Between Demographics,**  
333 **Peritraumatic Distress, Coping, and Trauma-related Symptoms**

334 Table 2 shows the results for this section. Regarding PTSD, peritraumatic distress emerged as the  
335 strongest independent predictor among all variables entered the model for White [ $\beta = 0.743$ ;  $p <$   
336  $.001$ ], Black [ $\beta = 0.675$ ;  $p < .001$ ], Hispanic [ $\beta = 0.701$ ;  $p < .001$ ], and other participants [ $\beta =$   
337  $0.679$ ;  $p < .001$ ]. In addition, several demographic predictors of PTSD emerged for distinct  
338 racial/ethnic groups. Sex [ $\beta = -0.22$ ;  $p < .01$ ] and employment [ $\beta = -0.159$ ;  $p < .05$ ] emerged as  
339 significant predictors for PTSD for Black participants only. Age [ $\beta = -0.089$ ;  $p < .05$ ] emerged  
340 as a significant predictor of PTSD for White participants only. Interestingly, Trauma coping self-  
341 efficacy was a strong independent predictor of PTSD for all groups except Hispanic participants  
342 [ $\beta = -0.144$ ;  $p = .064$ ]. The final model accounted for 66% of the PTSD variance [ $R^2 = 0.666$ ;  $p$   
343  $< 0.001$ ].

344 Similarly, peritraumatic distress was the strongest independent predictor of depression for White  
345 [ $\beta = 0.670$ ;  $p < .001$ ], Black [ $\beta = 0.416$ ;  $p < .001$ ], Hispanic [ $\beta = 0.617$ ;  $p < .001$ ], and other  
346 participants [ $\beta = 0.461$ ;  $p < .001$ ]. Employment status uniquely predicted depression for  
347 participants categorized as Other [ $\beta = 0.133$ ;  $p < .05$ ]. Trauma-coping self-efficacy predicted  
348 depression in all groups except Black participants [ $\beta = -0.174$ ;  $p = 0.076$ ]. The final model  
349 accounted for significant variance in peritraumatic distress [ $R^2 = 0.498$ ;  $p < 0.001$ ].



350 Finally, peritraumatic distress was again the strongest independent predictor for sleep health  
351 quality among White [ $\beta = 0.256$ ;  $p < .01$ ], Black [ $\beta = 0.298$ ;  $p < .01$ ], Hispanic [ $\beta = 0.341$ ;  $p <$   
352  $.01$ ], and other participants [ $\beta = 0.388$ ;  $p < .001$ ]. Sex was a unique predictor of sleep quality for  
353 White participants [ $\beta = 0.165$ ;  $p < .05$ ]. Trauma-coping self-efficacy was a significant predictor  
354 for White [ $\beta = -0.179$ ;  $p < .05$ ] and Black [ $\beta = -0.243$ ;  $p < .05$ ] participants. The final model  
355 accounted for 18% of the sleep health variance [ $R^2 = 0.186$ ;  $p < 0.001$ ].

356

357 [\* Insert table 3 here]

358 According to the multilinear regression results in table 3, when the entire sample is considered  
359 together and accounting for social determinants of health, peritraumatic distress and trauma  
360 coping strategies remain the most important predictors of PTSD [( $\beta = .711$ ;  $p = 0.000$ ); ( $\beta = -$   
361  $0.158$ ;  $p = 0.000$ ) ], depression [( $\beta = .565$  ;  $p = 0.000$ ); ( $\beta = -.191$ ;  $p = 0.000$ ) ], and sleep quality  
362 [( $\beta = 0.317$ ;  $p = 0.000$ ); ( $\beta = -0.152$ ;  $p = 0.001$ ) ], followed by geographical location in New York  
363 and sex. However, race/ethnicity is no longer a significant predictor of PTSD, depression, and  
364 sleep quality.

## 365 Discussion

366

367 Among a predominantly female, college-educated, and multi-ethnic group of survivors of the  
368 COVID-19 pandemic in New York State, this study assessed: 1) the prevalence of trauma-related  
369 symptoms and sleep quality; 2) the effects of socio-demographic factors and social determinants  
370 of health on trauma-related symptoms and sleep health, and whether this relationship is  
mediated/moderated by race/ethnicity. We found widespread and significant racial/ethnic

371 differences in COVID-19 trauma-related symptoms such as peritraumatic distress, PTSD,  
372 depression, and to a certain extent insufficient sleep.

373 Our first hypothesis regarding the effect of race/ethnicity was supported as it revealed that  
374 historically disadvantaged participants reported greater symptoms and levels of clinical  
375 peritraumatic distress, PTSD, and depression. For example, among our sample, Hispanics  
376 obtained the highest scores for peritraumatic distress, PTSD, and depression, followed by Black  
377 participants who also reported greater peritraumatic distress levels and PTSD compared to  
378 Whites and the other non-Hispanic group. This finding is consistent with research that has found  
379 that relative to other ethnic/racial groups, Whites are less likely to develop PTSD in response to  
380 traumatic exposure [45]. Previous research has suggested that, unlike their white counterparts,  
381 Blacks may be at higher risk for PTSD due to their lived experiences with historical, economic,  
382 and social trauma [46]. As such, COVID-19 seems to further exacerbate those social  
383 determinants of health among this group, contributing to the onset of PTSD symptoms. Some  
384 suggest that this stronger susceptibility to PTSD among Black people, specifically Black  
385 Americans, is due to increased exposure to racial discrimination that contributes to PTSD [47].

### 386 *Race, Sex, and Employment in PTSD*

387 Studies show that job loss, loss of health insurance coverage, social isolation, and housing-  
388 related stressors increased the risk of PTSD and chronic psychological distress during COVID-  
389 19 [43, 44]. Our second hypothesis regarding the relevance of social determinants, e.g.,  
390 employment status and male sex was partially supported as sex and employment emerged as  
391 significant predictors for PTSD for Black participants only [49]. This surprising result could be  
392 explained by the pre-existing socio-economic adversities faced by Black male New Yorkers and

393 the fact that the prevalence of COVID-19 was higher among men. As of April 12, 2020, near the  
394 height of the first wave in New York City, Hispanic and Black residents reported more housing-  
395 related stressors, such as fear of eviction and inability to pay rent [10]. The loss of health  
396 insurance and social isolation were also more likely to be reported by Hispanic populations [10].  
397 It is worth considering how the disproportionate loss from the pandemic for Black people was  
398 experienced in association with the Georges Floyd killing, and national uprisings against police  
399 brutality and may have contributed to elevated PTSD risk and severity [27] among Black males.  
400 Other research suggests that, even when considering race, social support is the strongest  
401 predictor for the trajectory of trauma symptoms [48]. This would mean that it is possible that  
402 disparate social disruption due to the pandemic impacted the severity and expression of trauma-  
403 related symptoms, as opposed to purely understanding pandemic-related stress as only race-  
404 related. This is consistent with the disproportionate economic stressors, including fears around  
405 eviction, that Black and Hispanic residents in NYC have reported [10].

#### 406 *The Influence of Peritraumatic Distress During COVID-19*

407 As expected, we found that across our sample, peritraumatic distress was the strongest predictor  
408 of trauma-related symptoms and sleep quality after controlling for social determinants or SES  
409 and coping skills. This is consistent with prior literature that has demonstrated COVID-19-  
410 related distress to be one of the strongest predictors of psychological problems like PTSD and  
411 insomnia [50, 51].

412

413

### *Limitations*

414

415 Although the significance of our findings through the fact that it is advancing data on the mental  
416 health consequences of the experiences of the COVID-19 pandemic from a racial/ethnic  
417 perspective in New York, it is worth noting some weaknesses that could impact the  
418 generalizability of the data. Data was gathered remotely with a convenient sampling method that  
419 could be a threat to the generalizability of our findings to the entire New York State population.  
420 Additionally, our findings are limited to self-reported instruments and there is no follow-up to  
421 assessment to evaluate the evolution of our study participants.

### **Conclusion**

422

423 In this study examining the COVID-19 trauma-related symptoms among a multiethnic group of  
424 New Yorkers, we found severe and widespread racial/ethnic differences/disparities in the level of  
425 peritraumatic distress, symptoms of PTSD, depression, and insufficient sleep. As New York and  
426 the rest of the world are trying to bounce back from the COVID-19 consequences, the mental  
427 health outcomes are devastating, particularly among historically marginalized communities. This  
428 study provides insight into the emergency for policymakers to invest in racial justice and healing  
429 initiatives across New York and nationally, and to provide free access to culturally responsive  
430 mental health care to tackle the racial/ethnic disparities in mental health.

431

432

433

434

435

436

## References

- 437 1. American Psychiatric Association. Diagnostic and Statistical Manual of Mental  
438 Disorders. 5<sup>th</sup> ed. Washington D.C.: 2013.
- 439 2. Veldhuis CB, Nesoff ED, McKowen ALW, et al: Addressing the critical need for long-  
440 term mental health data during the COVID-19 pandemic: Changes in mental health from April to  
441 September 2020. *Prev Med* 2021; 146:106465. DOI: 10.1016/j.ypmed.2021.106465
- 442 3. Brooks SK, Webster RK, Smith LE, et al. The psychological impact of quarantine and  
443 how to reduce it: rapid review of the evidence. *Lancet*. 2020;395(10227):912-920.  
444 doi:10.1016/S0140-6736(20)30460-8
- 445 4. Gharehgozli O, Nayebvali P, Gharehgozli A, Zamanian Z: Impact of COVID-19 on the  
446 Economic Output of the US Outbreak's. *Econ Disaster Clim Chang* 2020; 1-13.  
447 DOI:10.1007/s41885-020-00069-w
- 448 5. Yang W, Kandula S, Huynh M, et al: Estimating the infection-fatality risk of SARS-  
449 CoV-2 in New York City during the spring 2020 pandemic wave: a model-based analysis  
450 [published correction appears in *Lancet Infect Dis*. 2021 Jan;21(1):e1]. *Lancet Infect Dis* 2021;  
451 21(2):203-212. DOI:10.1016/S1473-3099(20)30769-6
- 452 6. Magas, I., Norman, C., Baxter, A., Harrison, M. Impact of COVID-19 on Mental Health  
453 in New York City. New York City Department of Health and Mental Hygiene, September 2020.  
454 <https://www1.nyc.gov/site/doh/about/press/pr2020/new-data-on-covid-19-mental-health.page>

- 455 7. Stijelja S, Mishara BL. COVID-19 and Psychological Distress-Changes in Internet  
456 Searches for Mental Health Issues in New York During the Pandemic. *JAMA Intern Med.*  
457 2020;180(12):1703-1706. doi:10.1001/jamainternmed.2020.3271
- 458 8. Xiao Y, Sharma MM, Thiruvalluru RK, et al. Trends in psychiatric diagnoses by  
459 COVID-19 infection and hospitalization among patients with and without recent clinical  
460 psychiatric diagnoses in New York city from March 2020 to August 2021. *Transl Psychiatry.*  
461 2022;12(1):492. Published 2022 Nov 21. doi:10.1038/s41398-022-02255-8
- 462 9. Blanc J, Briggs AQ, Seixas AA, et al: Addressing psychological resilience during the  
463 coronavirus disease 2019 pandemic: a rapid review. *Curr Opin Psychiatry* 2021; 34(1):29–35  
464 DOI: 10.1097/YCO.0000000000000665
- 465 10. Rudenstine S, McNeal K, Schulder T, Ettman CK, Hernandez M, Gvozdieva K, & Galea  
466 S: Depression and Anxiety During the COVID-19 Pandemic in an Urban, Low-Income Public  
467 University Sample. *J Trauma Stress* 2021; 34:12–22. DOI: [10.1002/jts.22600](https://doi.org/10.1002/jts.22600)
- 468 11. Silverman ME, Burgos L, Rodriguez ZI, et al. Postpartum mood among universally  
469 screened high and low socioeconomic status patients during COVID-19 social restrictions in  
470 New York City. *Sci Rep.* 2020;10(1):22380. Published 2020 Dec 24. doi:10.1038/s41598-020-  
471 79564-9
- 472 12. Ghassabian A, Jacobson MH, Kahn LG, Brubaker SG, Mehta-Lee SS, Trasande L.  
473 Maternal Perceived Stress During the COVID-19 Pandemic: Pre-Existing Risk Factors and  
474 Concurrent Correlates in New York City Women. *Int J Public Health.* 2022;67:1604497.  
475 Published 2022 Apr 11. doi:10.3389/ijph.2022.1604497

- 476 13. Abdalla M, Chiuzan C, Shang Y, et al: Factors Associated with Insomnia Symptoms in a  
477 Longitudinal Study among New York City Healthcare Workers during the COVID-19 Pandemic.  
478 *Int J Environ Res Public Health*. 2021; 18(17):8970. DOI: 10.3390/ijerph18178970
- 479 14. Shechter A, Diaz F, Moise N, et al: Psychological distress, coping behaviors, and  
480 preferences for support among New York healthcare workers during the COVID-19 pandemic.  
481 *Gen Hosp Psychiatry* 2020; 66:1-8. DOI: 10.1016/j.genhosppsych.2020.06.007
- 482 15. Behbahani S, Smith CA, Carvalho M, et al: Vulnerable Immigrant Populations in the  
483 New York Metropolitan Area and COVID-19: Lessons Learned in the Epicenter of the Crisis.  
484 *Acad Med* 2020; 95(12):1827–1830. DOI: [10.1097/ACM.0000000000003518](https://doi.org/10.1097/ACM.0000000000003518)
- 485 16. Thompson CN, Baumgartner J, Pichardo C, et al: COVID-19 Outbreak - New York City,  
486 February 29-June 1, 2020 [published correction appears in MMWR Morb Mortal Wkly Rep.  
487 2020 Dec 18;69(50):1930]. *MMWR Morb Mortal Wkly Rep*. 2020; 69(46):1725-1729.  
488 DOI:10.15585/mmwr.mm6946a2
- 489 17. Renelus BD, Khoury NC, Chandrasekaran K, et al: Racial Disparities in COVID-19  
490 Hospitalization and In-hospital Mortality at the Height of the New York City Pandemic. *J Racial*  
491 *Ethn Health Disparities* 2020; 1–7. DOI:[10.1007/s40615-020-00872-x](https://doi.org/10.1007/s40615-020-00872-x)
- 492 18. Ogedegbe G, Ravenell J, Adhikari S, et al: Assessment of Racial/Ethnic Disparities in  
493 Hospitalization and Mortality in Patients With COVID-19 in New York City. *JAMA Netw Open*  
494 2020; 3(12):e2026881. DOI: [10.1001/jamanetworkopen.2020.26881](https://doi.org/10.1001/jamanetworkopen.2020.26881)
- 495 19. Holtgrave DR, Barranco MA, Tesoriero JM, et al: Assessing racial and ethnic disparities  
496 using a COVID-19 outcomes continuum for New York State. *Ann Epidemiol* 2020; 48:9–14.  
497 DOI: [10.1016/j.annepidem.2020.06.010](https://doi.org/10.1016/j.annepidem.2020.06.010)

- 498 20. McKnight-Eily LR, Okoro CA, Strine TW, et al. Racial and Ethnic Disparities in the  
499 Prevalence of Stress and Worry, Mental Health Conditions, and Increased Substance Use Among  
500 Adults During the COVID-19 Pandemic - United States, April and May 2020. *MMWR Morb*  
501 *Mortal Wkly Rep.* 2021;70(5):162-166. Published 2021 Feb 5. doi:10.15585/mmwr.mm7005a3
- 502 21. Thomeer MB, Moody MD, Yahirun J. Racial and Ethnic Disparities in Mental Health and  
503 Mental Health Care During The COVID-19 Pandemic [published online ahead of print, 2022  
504 Mar 22]. *J Racial Ethn Health Disparities.* 2022;1-16. doi:10.1007/s40615-022-01284-9
- 505 22. Gur RE, White LK, Waller R, et al. The Disproportionate Burden of the COVID-19  
506 Pandemic Among Pregnant Black Women. *Psychiatry Res.* 2020;293:113475.  
507 doi:10.1016/j.psychres.2020.113475
- 508 23. Park J. Who is hardest hit by a pandemic? Racial disparities in COVID-19 hardship in the  
509 U.S., *International Journal of Urban Sciences.* 2021. 25:2, 149-177, DOI:  
510 [10.1080/12265934.2021.1877566](https://doi.org/10.1080/12265934.2021.1877566)
- 511 24. Garcia MA, Homan PA, García C, Brown TH. The Color of COVID-19: Structural  
512 Racism and the Disproportionate Impact of the Pandemic on Older Black and Latinx Adults. *The*  
513 *Journals of gerontology. Series B, Psychological Sciences and Social Sciences.* 2021  
514 Feb;76(3):e75-e80. DOI: 10.1093/geronb/gbaa114.
- 515 25. Macias Gil R, Marcelin JR, Zuniga-Blanco B, et al. COVID-19 Pandemic: Disparate  
516 Health Impact on the Hispanic/Latinx Population in the United States. *The Journal of Infectious*  
517 *Diseases.* 2020 Oct;222(10):1592-1595. DOI: 10.1093/infdis/jiaa474.
- 518 26. Laurencin CT, Walker JM. A Pandemic on a Pandemic: Racism and COVID-19 in  
519 Blacks. *Cell Systems.* 2020 Jul;11(1):9-10. DOI: 10.1016/j.cels.2020.07.002. PMID: 32702320;  
520 PMCID: PMC7375320.



- 521 27. Airhihenbuwa, CO: From 1619 to COVID-19: A Double Pandemic. *Health Promot Pract*  
522 2020; 21(6):857–858. DOI: [10.1177/1524839920953819](https://doi.org/10.1177/1524839920953819)
- 523 28. Lopez L, Hart LH, Katz MH. Racial and Ethnic Health Disparities Related to COVID-19.  
524 *JAMA*. 2021;325(8):719–720. doi:10.1001/jama.2020.26443
- 525 29. Santos, GM., Ackerman, B., Rao, A. *et al.* Economic, Mental Health, HIV Prevention  
526 and HIV Treatment Impacts of COVID-19 and the COVID-19 Response on a Global Sample of  
527 Cisgender Gay Men and Other Men Who Have Sex with Men. *AIDS Behav* 25, 311–321 (2021).  
528 DOI: [10.1007/s10461-020-02969-0](https://doi.org/10.1007/s10461-020-02969-0)
- 529 30. Nagata, J. M., Ganson, K. T., Whittle, H. J., Chu, J., Harris, O. O., Tsai, A. C., & Weiser,  
530 S. D. (2021). Food Insufficiency and Mental Health in the U.S. During the COVID-19 Pandemic.  
531 *American Journal of Preventive Medicine*, 60(4), 453-461. DOI: [10.1016/j.amepre.2020.12.004](https://doi.org/10.1016/j.amepre.2020.12.004)
- 532 31. Kousoulis AA, Goldie I. A Visualization of a Socio-Ecological Model for Urban Public  
533 Mental Health Approaches. *Front Public Health*. 2021;9:654011. Published 2021 May 13.  
534 doi:10.3389/fpubh.2021.654011
- 535 32. WEISÆTH, L. Vulnerability and protective factors for posttraumatic stress disorder.  
536 *Psychiatry and Clinical Neurosciences* 1998; 52: S39-S44. [https://doi.org/10.1046/j.1440-](https://doi.org/10.1046/j.1440-1819.1998.0520s5083.x)  
537 [1819.1998.0520s5083.x](https://doi.org/10.1046/j.1440-1819.1998.0520s5083.x)
- 538 33. Blevins CA, Weathers FW, Davis MT, et al: The Posttraumatic Stress Disorder Checklist  
539 for DSM-5 (PCL-5): Development and Initial Psychometric Evaluation. *J Trauma Stress* 2015;  
540 28(6):489–498. DOI: 10.1002/jts.22059
- 541 34. Bovin MJ, Marx BP, Weathers FW, Gallagher MW, Rodriguez P, Schnurr PP, & Keane  
542 TM: Psychometric properties of the PTSD Checklist for Diagnostic and Statistical Manual of

- 543 Mental Disorders-Fifth Edition (PCL-5) in Veterans. *Psychological Assessment* 2016; 28(11),  
544 1379-1391. DOI: 10.1037/pas0000254
- 545 35. Seo JG & Park SP: Validation of the Patient Health Questionnaire-9 (PHQ-9) and PHQ-2  
546 in patients with migraine. *J Headache Pain* 2015; 16:65. DOI:10.1186/s10194-015-0552-2
- 547 36. Shevlin M, Butter S, McBride O, et al. Measurement invariance of the Patient Health  
548 Questionnaire (PHQ-9) and Generalized Anxiety Disorder scale (GAD-7) across four European  
549 countries during the COVID-19 pandemic. *BMC Psychiatry*. 2022;22(1):154. Published 2022  
550 Mar 1. doi:10.1186/s12888-022-03787-5
- 551 37. Buysse DJ, Reynolds CF 3rd, Monk TH, et al: The Pittsburgh Sleep Quality Index: a new  
552 instrument for psychiatric practice and research. *Psychiatry Res* 1989; 28(2):193–213. DOI:  
553 10.1016/0165-1781(89)90047-4
- 554 38. Pilz LK, Keller LK, Lenssen D, & Roenneberg T: Time to rethink sleep quality: PSQI  
555 scores reflect sleep quality on workdays. *Sleep* 2018; 41(5). DOI: 10.1093/sleep/zsy029
- 556 39. Brunet A, Weiss DS, Metzler TJ, et al: The Peritraumatic Distress Inventory: a proposed  
557 measure of PTSD criterion A2. *Am J Psychiatry* 2001; 158(9):1480–1485. DOI:  
558 10.1176/appi.ajp.158.9.1480
- 559 40. Bunnell BE, Davidson TM, & Ruggiero KJ: The Peritraumatic Distress Inventory: Factor  
560 structure and predictive validity in traumatically injured patients admitted through a Level I  
561 trauma center. *J Anxiety Disord* 2018; 55:8–13. DOI: 10.1016/j.janxdis.2018.03.002
- 562 41. Benight CC, Shoji K, James LE, et al: Trauma Coping Self-Efficacy: A Context-Specific  
563 Self-Efficacy Measure for Traumatic Stress. *Psychol Trauma* 2020; 7(6):591–599. DOI:  
564 10.1037/tra0000045

- 565 42. Shahrour G & Dardas LA: Acute stress disorder, coping self-efficacy and subsequent  
566 psychological distress among nurses amid COVID-19. *J Nurse Manag* 2020; 28(7):1686–1695.  
567 DOI: 10.1111/jonm.13124
- 568 43. Asmundson G, Paluszek MM, Landry CA, et al: Do pre-existing anxiety-related and  
569 mood disorders differentially impact COVID-19 stress responses and coping?. *J Anxiety Disord*  
570 2020; 74:102271. DOI: [10.1016/j.janxdis.2020.102271](https://doi.org/10.1016/j.janxdis.2020.102271)
- 571 44. Boyraz G & Legros DN: Coronavirus Disease (COVID-19) and Traumatic Stress:  
572 Probable Risk Factors and Correlates of Posttraumatic Stress Disorder. *J Loss Trauma* 2020;  
573 25(6-7):503-522. DOI: 10.1080/15325024.2020.1763556
- 574 45. Roberts AL, Gilman SE, Breslau J, et al: Race/ethnic differences in exposure to traumatic  
575 events, development of post-traumatic stress disorder, and treatment-seeking for post-traumatic  
576 stress disorder in the United States. *Psychol Med* 2011; 41(1):71–83. DOI:  
577 10.1017/S0033291710000401
- 578 46. Alexander AC, Ali J, McDevitt-Murphy ME, et al. Racial Differences in Posttraumatic  
579 Stress Disorder Vulnerability Following Hurricane Katrina Among a Sample of Adult Cigarette  
580 Smokers from New Orleans. *J Racial Ethn Health Disparities*. 2017;4(1):94-103.  
581 doi:10.1007/s40615-015-0206-8
- 582 47. Holmes SC, Facemire VC, & DaFonseca AM: Expanding criterion a for posttraumatic  
583 stress disorder: Considering the deleterious impact of oppression. *Traumatol* 2016; 22(4):314–  
584 321. DOI: [10.1037/trm0000104](https://doi.org/10.1037/trm0000104)
- 585 48. Galovski TE, Peterson ZD, Fox-Galalis A: Trajectories of Posttraumatic Stress and  
586 Depression in Police and Community Members Following the Violence during Civil Unrest in  
587 Ferguson, Missouri. *Am J Community Psychol* 2018; 62(3-4):433-448. DOI:10.1002/ajcp.12273

- 588 49. Moody AT & Lewis, JA: Gendered racial microaggressions and traumatic stress  
589 symptoms among Black women. *Psychol Women Q* 2019; 4(2):201–214. [DOI:](#)  
590 [10.1177/0361684319828288](https://doi.org/10.1177/0361684319828288)
- 591 50. Kokou-Kpolou CK, Megalakaki O, Laimou D, & Kousouri M: Insomnia during COVID-  
592 19 pandemic and lockdown: Prevalence, severity, and associated risk factors in French  
593 population. *Psychiatry Res* 2020; 290:113128 [DOI: 10.1016/j.psychres.2020.113128](#)
- 594 51. Massazza A, Joffe H, Hyland P, Brewin CR: The structure of peritraumatic reactions and  
595 their relationship with PTSD among disaster survivors. *J Abnorm Psychol* 2021;  
596  
597

**Table 1: Characteristics of the Participants by Race/Ethnicity, N= 541, (\*\* = P < 0.05)**

| <b>Race/Ethnicity, total(%)</b>     |              |               |                  |              |          |                  |
|-------------------------------------|--------------|---------------|------------------|--------------|----------|------------------|
| <b>Participants Characteristics</b> | <b>White</b> | <b>Blacks</b> | <b>Hispanics</b> | <b>Other</b> | <b>P</b> | <b>Total (%)</b> |
|                                     | 198(36.6)    | 111(20.5)     | 97(17.9)         | 135(25)      |          | 541              |
| Age, mean (SD)<br>[40.9(15.3)]      | 46.58(16.2)  | 39(13)        | 35.8(12.4)       | 37.5(14.9)   | 0.665    |                  |
| Female                              | 153(77.3)    | 57(51.4)      | 72(74.2)         | 91(67.4)     | 0.000    | 373(68.9)        |
| Male                                | 45(22.7)     | 54(48.6)      | 25(25.8)         | 44(32.6)     |          | 168(31.1)        |
| US-Born, n(%)                       | 173(92)      | 76(82.6)      | 68(79.1)         | 101(84.9)    | 0.028    | 418(86.2)        |
| Marital Status                      |              |               |                  |              | 0.010    |                  |
| Married, n(%)                       | 105(53.3)    | 38(34.2)      | 38(39.6)         | 51(39.6)     |          | 232(43.1)        |
| Separated, n(%)                     | 4(2)         | 3(2.7)        | 6(6.3)           | 4(3)         |          | 17(3.2)          |
| Widowed, n(%)                       | 7(3.5)       | 4(3.6)        | 2(2.1)           | 6(4.5)       |          | 19(3.5)          |

|                                   |           |          |          |          |                  |
|-----------------------------------|-----------|----------|----------|----------|------------------|
| Never married, n(%)               | 63(31.8)  | 57(51.4) | 48(50)   | 60(45.1) | 228(42.4)        |
| Single, n(%)                      | 19(9.6)   | 9(8.1)   | 2(2.1)   | 12(9)    | 42(7.8)          |
| Education                         |           |          |          |          | 0.000            |
| Without a college education, n(%) | 2(1)      | 6(5.4)   | 11(11.3) | 12(9)    | 31(5.8)          |
| With College education, n(%)      | 116(58.9) | 81(73)   | 66(68)   | 79(59.4) | <b>342(63.2)</b> |
| Graduate degree, n(%)             | 79(47.9)  | 24(14.5) | 20(20.6) | 42(25.5) | 165(30.7)        |
| Income                            |           |          |          |          | 0.213            |
| Less than < \$48,499, n(%)        | 40(20.7)  | 17(15.5) | 20(21.1) | 26(19.8) | 103(19.8)        |
| < \$48,500- 145, 499, n(%)        | 133(68.9) | 80(72.7) | 63(66.3) | 79(60.3) | <b>355(67.1)</b> |
| > \$145,500, n(%)                 | 20(10.4)  | 13(11.8) | 12(12.6) | 26(19.8) | 71(13.4)         |
| Job type                          |           |          |          |          |                  |

|                                                     |            |            |            |           |              |                  |
|-----------------------------------------------------|------------|------------|------------|-----------|--------------|------------------|
| Employed, n(%)                                      | 147 (74.2) | 86(78.2)   | 73(75.3)   | 106(79.7) | 0.665        | <b>412(76.6)</b> |
| Essential Worker, n(%)                              | 50(26.2)   | 29(30.5)   | 13(16.3)   | 31(25.4)  | 0.177        | 123(25.2)        |
| Health Care Worker, n(%)                            | 27(14.1)   | 13(13.7)   | 4(5)       | 23(18.9)  | 0.049        | 67(13.7)         |
| COVID-19-related experience                         |            |            |            |           |              |                  |
| Diagnosed with COVID-19, n(%)                       | 7(3.5)     | 1(0.9)     | 8(8.2)     | 6(4.4)    | <b>0.060</b> | 22(4.1)          |
| A family member was diagnosed, n(%)                 | 21(10.6)   | 26(23.4)   | 32(33)     | 23(17)    | <b>0.000</b> | 102(18.9)        |
| Peritraumatic Distress, mean(SD)                    | 24.1(7.6)  | 26.3(6.4)  | 27.2(8.2)  | 24.9(8.2) | <b>0.005</b> | 25.3(7.7)        |
| Prevalence of clinical Peritraumatic Distress, n(%) | 104 (53.3) | 83(75.5)   | 70(72.9)   | 75(56.)   | <b>0.000</b> | 332(62.1%)       |
| PTSD, mean(SD)                                      | 14.8(14.5) | 20.8(13.2) | 21.8(17.5) | 17.4(15)  | <b>0.000</b> | 18.0(15.2)       |
| Clinical PTSD Prevalence, n(%)                      | 31(16.3)   | 28(25.7)   | 24(25)     | 30(22.4)  | 0.177        | 113(21.4)        |

|                                              |            |            |            |            |              |            |
|----------------------------------------------|------------|------------|------------|------------|--------------|------------|
| Depression,<br>mean(SD)                      | 7.6(6.2)   | 7.6(4)     | 11.2(7.2)  | 8.6(6.8)   | <b>0.000</b> | 8.5(6.4)   |
| Clinical Depression<br>Prevalence, n(%)      | 77(39.9)   | 52(47.7)   | 62(64.6)   | 66(49.3)   | <b>0.001</b> | 257(48.3%) |
| Sleep Duration<br>(mean(SD))                 | 6.8(1.3)   | 6.6(1.3)   | 6.5(1.6)   | 6.8(0.1)   | 0.285        | 6.7(1.2)   |
| Prevalence of<br>Insufficient sleep,<br>n(%) | 69(39.4)   | 43(41.7)   | 46(52.3)   | 40(34.2)   | <b>0.057</b> | 198(41%)   |
| Sleep Quality,<br>mean(SD)                   | 9.6(3.8)   | 10.14(3.3) | 10.6(4.1)  | 10(3.3)    | .339         | 10.04(3.8) |
| Coping, mean(SD)                             | 48.7(12.7) | 45.7(9.4)  | 45.4(12.8) | 47.6(12.9) | <b>0.008</b> | 47.2(12.2) |



**Table 2: Stratified multilinear regression analyses predicting PTSD, Depression and Sleep Health by Race/Ethnicity**

| PTSD                           | Whites |              |          |        | Blacks |              |          | Hispanics |          |              |        | Others   |          |              |        |        |
|--------------------------------|--------|--------------|----------|--------|--------|--------------|----------|-----------|----------|--------------|--------|----------|----------|--------------|--------|--------|
|                                | Beta   | <i>P</i>     | 95.0% CI |        | Beta   | <i>P</i>     | 95.0% CI | Beta      | <i>P</i> | 95.0% CI     | Beta   | <i>p</i> | 95.0% CI |              |        |        |
| <b>(Constant)</b>              |        | 0.092        | -18.761  | 1.427  | Model  | 0.086        | -1.709   | 25.603    | 0.99     | -19.464      | 19.713 | 0.398    | -17.794  | 7.125        |        |        |
| <b>Age</b>                     | -0.089 | <b>0.041</b> | -0.156   | -0.003 | -0.103 | 0.126        | -0.253   | 0.032     | -0.057   | 0.441        | -0.285 | 0.125    | 0.021    | 0.713        | -0.09  | 0.131  |
| <b>City</b>                    | -0.007 | 0.852        | -2.444   | 2.021  | 0.076  | 0.238        | -1.652   | 6.573     | 0.035    | 0.62         | -4.074 | 6.794    | 0.144    | <b>0.01</b>  | 1.034  | 7.511  |
| <b>Sex</b> (1= male; 2=female) | 0.019  | 0.632        | -1.977   | 3.246  | -0.22  | <b>0.001</b> | -9.133   | -2.533    | -0.097   | 0.174        | -9.717 | 1.788    | -0.092   | 0.099        | -6.311 | 0.547  |
| <b>Employed</b>                | 0.05   | 0.247        | -1.148   | 4.437  | -0.159 | <b>0.017</b> | -9.195   | -0.931    | -0.031   | 0.674        | -7.132 | 4.637    | 0.085    | 0.128        | -0.922 | 7.222  |
| <b>PDI</b>                     | 0.743  | <b>0.000</b> | 1.203    | 1.534  | 0.675  | <b>0.000</b> | 1.079    | 1.596     | 0.701    | <b>0.000</b> | 1.156  | 1.826    | 0.679    | <b>0.000</b> | 0.993  | 1.457  |
| <b>CES-T</b>                   | -0.164 | <b>0.000</b> | -0.284   | -0.084 | -0.157 | 0.017        | -0.381   | -0.039    | -0.144   | 0.064        | -0.398 | 0.012    | -0.176   | <b>0.006</b> | -0.353 | -0.059 |

**R<sup>2</sup>= 0.666; p=0.000**

| Depression                     | White |              |               | Blacks |              |              | Hispanics |              |               | Others |              |               |
|--------------------------------|-------|--------------|---------------|--------|--------------|--------------|-----------|--------------|---------------|--------|--------------|---------------|
|                                | Beta  | P            | 95.0% CI      | Beta   | P            | 95.0%        | Beta      | P            | 95.0% CI      | Beta   | p            | 95.0% CI      |
| <b>Model</b>                   |       | 0.091*       | -10.739 0.809 |        | 0.061**      | -0.355 14.91 |           | 0.41***      | -4.869 11.826 |        | 0.179*****   | -2.187 11.632 |
| <b>Age</b>                     | -0.05 | 0.374        | -0.063 0.024  | -0.121 | 0.231        | -0.128 0.031 | -0.174    | <b>0.023</b> | -0.189 -0.014 | -0.13  | 0.053        | -0.122 0.001  |
| <b>City</b>                    | -0.06 | 0.234        | -2.05 0.504   | -0.131 | 0.174        | -3.885 0.712 | -0.07     | 0.331        | -3.454 1.177  | -0.11  | 0.095        | -3.321 0.271  |
| <b>Sex</b> (1= male; 2=female) | 0.067 | 0.187        | -0.492 2.496  | -0.029 | 0.761        | -2.127 1.561 | 0.003     | 0.963        | -2.394 2.509  | 0.099  | 0.131        | -0.44 3.363   |
| <b>Employed</b>                | 0.106 | 0.059        | -0.061 3.134  | -0.01  | 0.92         | -2.426 2.192 | 0.079     | 0.294        | -1.175 3.84   | 0.133  | <b>0.046</b> | 0.044 4.561   |
| <b>PDI</b>                     | 0.67  | <b>0.000</b> | 0.449 0.639   | 0.416  | <b>0.000</b> | 0.163 0.452  | 0.617     | <b>0.000</b> | 0.403 0.689   | 0.461  | <b>0.000</b> | 0.262 0.519   |

**CES-T**      -0.122   0.038   -0.118   -0.003   -0.174   0.076   -0.182   0.009   -0.168   0.036   -0.181   -0.006   -0.305   **0.000**   -0.249   -0.086

**\* R2=0.498; p =.000**

| <b>Sleep</b>                  | <b>White</b> |              |                 | <b>Blacks</b> |          |                 | <b>Hispanics</b> |          |                 | <b>Others</b> |          |                 |        |       |        |       |
|-------------------------------|--------------|--------------|-----------------|---------------|----------|-----------------|------------------|----------|-----------------|---------------|----------|-----------------|--------|-------|--------|-------|
|                               | <b>Beta</b>  | <b>P</b>     | <b>95.0% CI</b> | <b>Beta</b>   | <b>P</b> | <b>95.0% CI</b> | <b>Beta</b>      | <b>P</b> | <b>95.0% CI</b> | <b>Beta</b>   | <b>p</b> | <b>95.0% CI</b> |        |       |        |       |
| <b>(Constant)</b>             |              | 0.000        | 3.281           | 11.429        | 0.000    | 6.283           | 15.849           | 0.008    | 2.416           | 15.214        | 0.000    | 4.198           | 12.244 |       |        |       |
| <b>Age</b>                    | -0.101       | 0.188        | -0.051          | 0.01          | -0.134   | 0.201           | -0.082           | 0.017    | -0.131          | 0.221         | -0.109   | 0.026           | 0.014  | 0.864 | -0.033 | 0.039 |
| <b>City</b>                   | -0.029       | 0.677        | -1.091          | 0.71          | 0.004    | 0.969           | -1.412           | 1.468    | 0.034           | 0.738         | -1.475   | 2.075           | -0.068 | 0.407 | -1.491 | 0.609 |
| <b>Sex(1= male; 2=female)</b> | 0.165        | <b>0.018</b> | 0.225           | 2.333         | 0.027    | 0.781           | -0.994           | 1.318    | -0.074          | 0.471         | -2.564   | 1.195           | -0.051 | 0.54  | -1.452 | 0.764 |
| <b>Employed</b>               | 0.136        | 0.077        | -0.11           | 2.144         | 0.017    | 0.864           | -1.322           | 1.573    | 0.065           | 0.543         | -1.332   | 2.512           | 0.1    | 0.231 | -0.516 | 2.117 |

|              |        |              |        |        |        |              |        |        |        |              |        |       |        |              |       |       |
|--------------|--------|--------------|--------|--------|--------|--------------|--------|--------|--------|--------------|--------|-------|--------|--------------|-------|-------|
| <b>PDI</b>   | 0.256  | <b>0.002</b> | 0.04   | 0.174  | 0.298  | <b>0.004</b> | 0.043  | 0.224  | 0.341  | <b>0.004</b> | 0.055  | 0.274 | 0.388  | <b>0.000</b> | 0.077 | 0.227 |
| <b>CES-T</b> | -0.179 | 0.027        | -0.086 | -0.005 | -0.243 | 0.017        | -0.133 | -0.014 | -0.049 | 0.658        | -0.082 | 0.052 | -0.169 | 0.076        | -0.09 | 0.004 |

R2= .186; p =.000

**Table 3: Multilinear regression analyses with social determinants of health, race/ethnicity and sex predicting PTSD, Depression and Sleep Health**

| Variables Model        | PTSD   |       |             |             | Depression          |       |             |             | Sleep               |       |             |             |
|------------------------|--------|-------|-------------|-------------|---------------------|-------|-------------|-------------|---------------------|-------|-------------|-------------|
|                        | Beta   | p     | 95.0% CI    |             | Beta                | p     | 95.0% CI    |             | Beta                | p     | 95.0% CI    |             |
|                        |        |       | Lower Bound | Upper Bound |                     |       | Lower Bound | Upper Bound |                     |       | Lower Bound | Upper Bound |
|                        |        | 0.651 | -8.374      | 5.241       |                     | 0.887 | -3.339      | 3.860       |                     | 0.000 | 6.242       | 10.959      |
| Age                    | -0.055 | 0.062 | -0.112      | 0.003       | -0.112              | 0.002 | -0.079      | -0.018      | -0.079              | 0.087 | -0.037      | 0.003       |
| Sex                    | -0.089 | 0.001 | -4.650      | -1.234      | 0.062               | 0.055 | -0.018      | 1.788       | 0.038               | 0.358 | -0.315      | 0.869       |
| Race/Ethnicity         | 0.011  | 0.680 | -0.523      | 0.801       | 0.052               | 0.113 | -0.067      | 0.633       | -0.017              | 0.684 | -0.278      | 0.182       |
| NYC resident           | 0.054  | 0.043 | 0.053       | 3.257       | -0.094              | 0.004 | -2.098      | -0.404      | -0.027              | 0.519 | -0.739      | 0.373       |
| Employed               | -0.006 | 0.832 | -2.159      | 1.739       | 0.090               | 0.008 | 0.371       | 2.432       | 0.078               | 0.073 | -0.057      | 1.294       |
| Trauma Coping          | -0.158 | 0.000 | -0.265      | -0.122      | -0.191              | 0.000 | -0.139      | -0.064      | -0.152              | 0.001 | -0.066      | -0.017      |
| Peritraumatic Distress | 0.711  | 0.000 | 1.252       | 1.480       | 0.565               | 0.000 | 0.412       | 0.533       | 0.317               | 0.000 | 0.095       | 0.175       |
| R2= .67;<br>p=<.001    |        |       |             |             | R2= .50;<br>p=<.001 |       |             |             | R2= .18;<br>p=<.001 |       |             |             |

1

2

3

4
